# Supplementary material
Source: Springer Nature journal article supplement (https://www.springermedizin.de/resource/supplementary/12947_2009_279_MOESM5_ESM.pdf/9556602)

Baseline

Mental Stress

NTG

Normal

Diam 0.64 cm

Diam 0.68 cm

Diam 0.67 cm

Scale: 0.5 cm

Hypertensive

Diam 0.82 cm

Diam 0.83 cm

Diam 0.88 cm

Scale: 0.5 cm

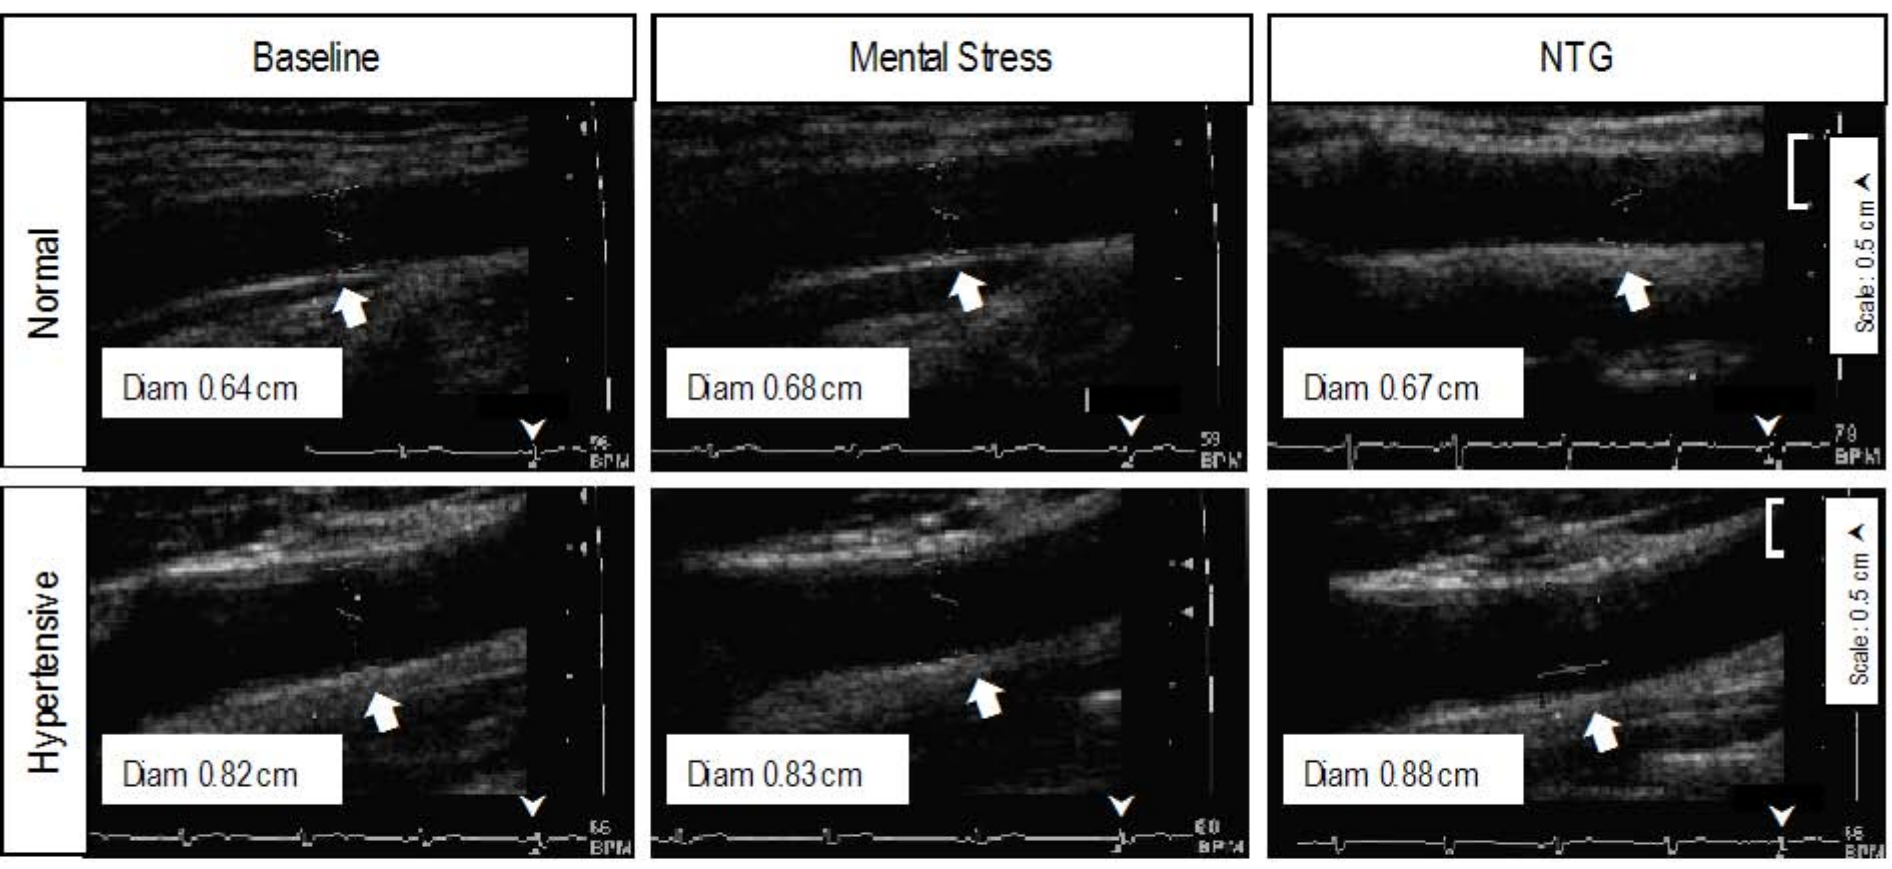

Supplement: MOESM5 [file 9556602]
